# Supplementary material for: Effective chiral recognition among ions in polar media
Source: Royal Society of Chemistry journal article supplement (doi:10.1039/b516255f), 2006-01-01
Supplement: b516255f.pdf [file b516255f.pdf]

## Effective chiral recognition among ions in polar media

Sheba D. Bergman,<sup>a</sup> Richard Frantz,<sup>b</sup> Dalia Gut,<sup>a</sup> Moshe Kol\*<sup>a</sup> and Jérôme Lacour\*<sup>b</sup>

---

### Supporting Information

---

**General Information.** Solvents were dried and distilled prior to use. Chloroform (Fluka) and CD<sub>2</sub>Cl<sub>2</sub> were filtered on basic alumina before use. Analytical thin layer chromatography was performed on Merck 0.25 mm silica gel plates. Visualization was accomplished with UV light. <sup>1</sup>H, <sup>13</sup>C, <sup>19</sup>F and <sup>31</sup>P NMR spectra were recorded on a Bruker AMX-500 spectrometer. Chemical shifts are given in ppm. <sup>1</sup>H chemical shifts were reported relative to Me<sub>4</sub>Si. <sup>31</sup>P chemical shifts were reported relative to H<sub>3</sub>PO<sub>4</sub>. <sup>19</sup>F chemical shifts were reported relative to CFC<sub>3</sub>. Optical rotations were measured on a JASCO P-1030 polarimeter in a thermostated (20 °C) 10.0 cm long microcell with high pressure lamps of sodium and are reported as follows:  $[\alpha]_{\lambda}^{20}$  (c (g/100 ml), solvent). UV spectra were recorded on a CARY 1 BIO spectrophotometer in a 1 cm quartz cell;  $\lambda_{\max}$  were given in nm and molar adsorption coefficient  $\epsilon$  in mol<sup>-1</sup>.L.cm<sup>-1</sup>. Circular dichroism spectra were recorded on a JASCO J-715 spectropolarimeter in a 1 cm quartz cell;  $\lambda$  were given in nm and molar circular-dichroic absorption  $\Delta\epsilon$  in mol<sup>-1</sup>.L.cm<sup>-1</sup>. FABMS were obtained on a VG-AutoSpec M250 mass spectrometer, in a *m*-nitrobenzyl alcohol matrix.

# Synthesis

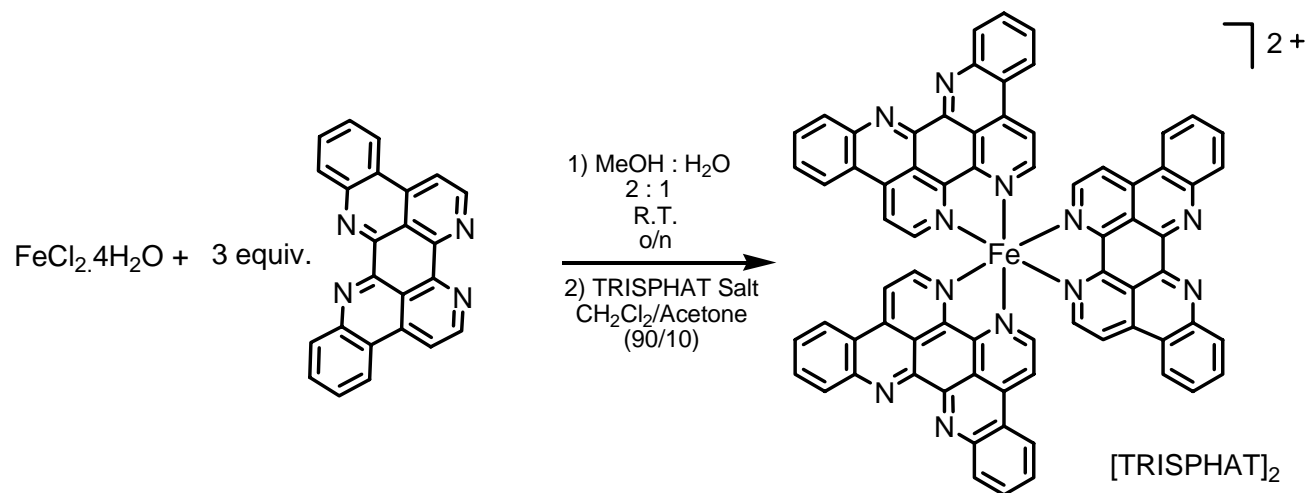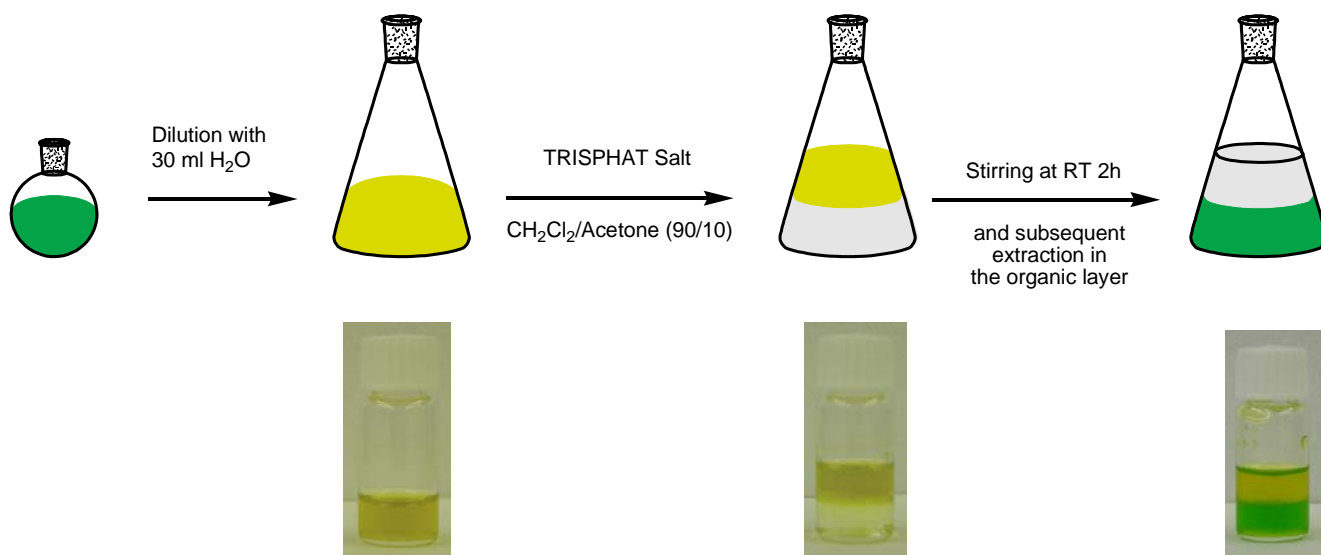

$[\text{Fe}(\mathbf{3})]_3[\mathbf{4-1}]_2$ , Yield = 80 %;  $[\text{Fe}(\mathbf{3})]_3[\mathbf{1-1}]_2$ , Yield = 70 %

$^1\text{H}$  NMR (500 MHz)

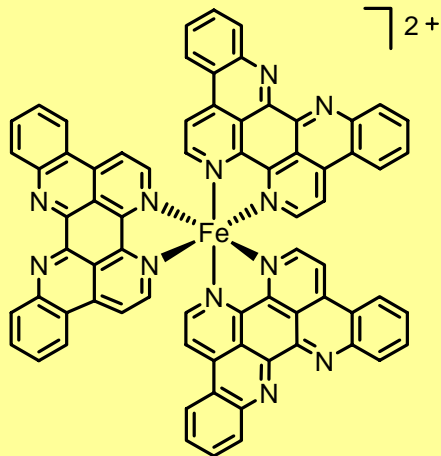

**NO** trace of the minor diastereomer  
even in 90% acetone.  
Only traces of free ligand □  
see next page

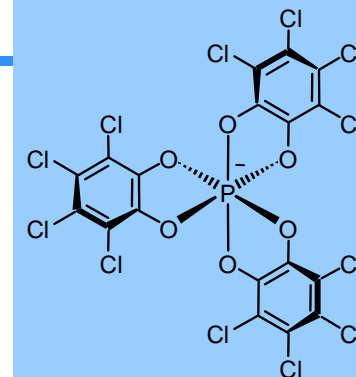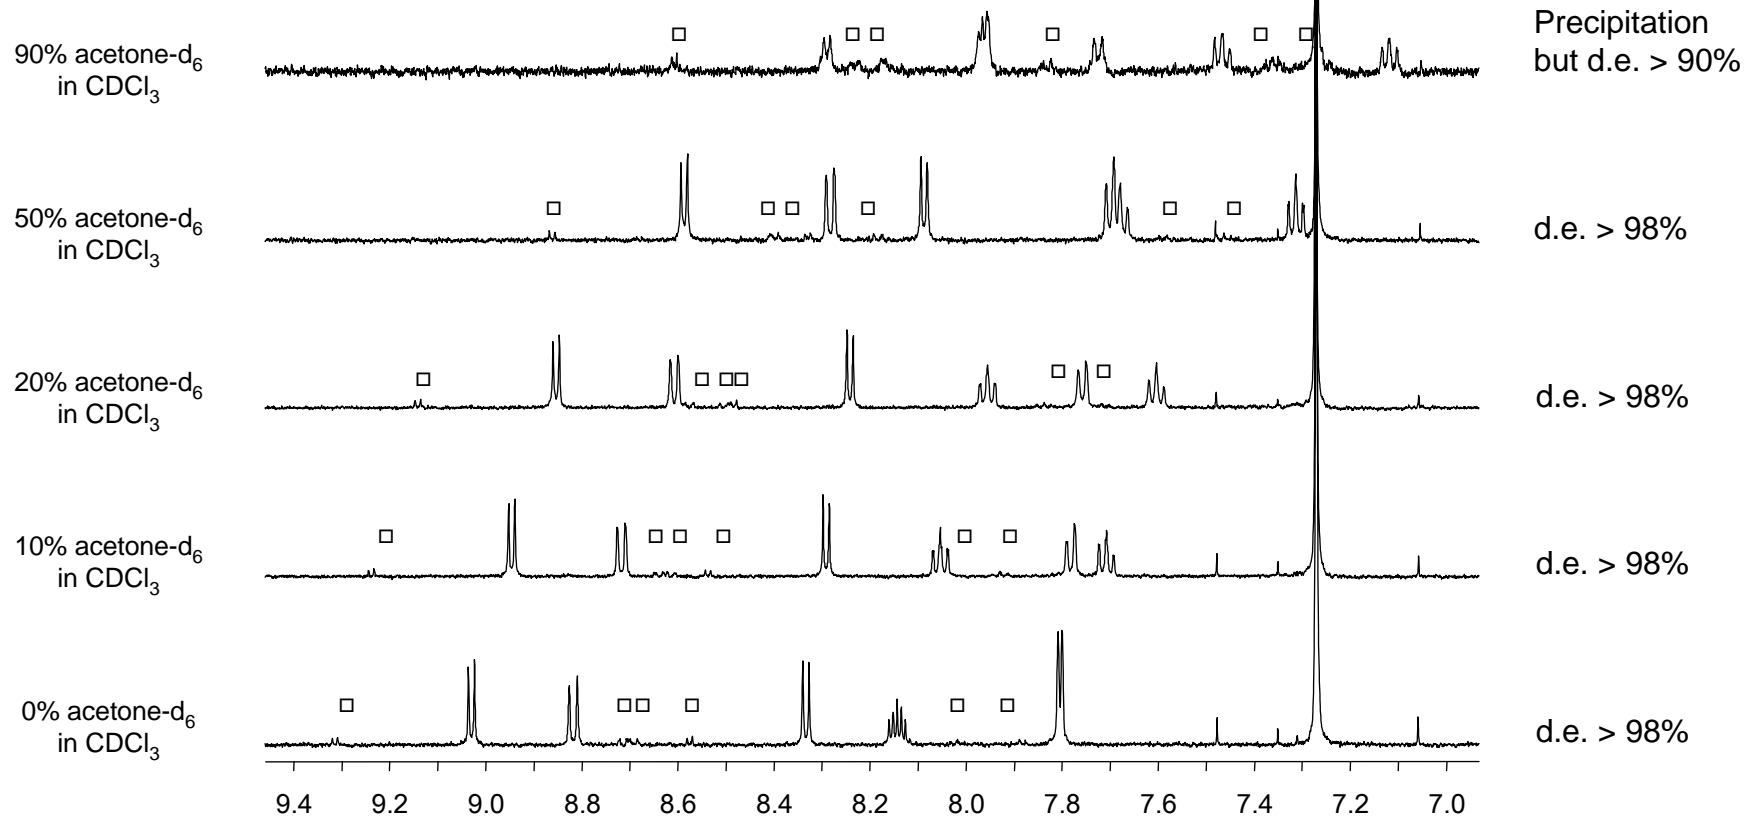

$^1\text{H}$  NMR (500 MHz)

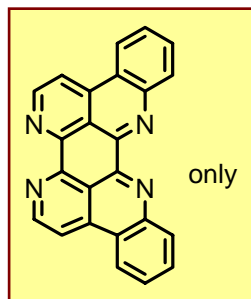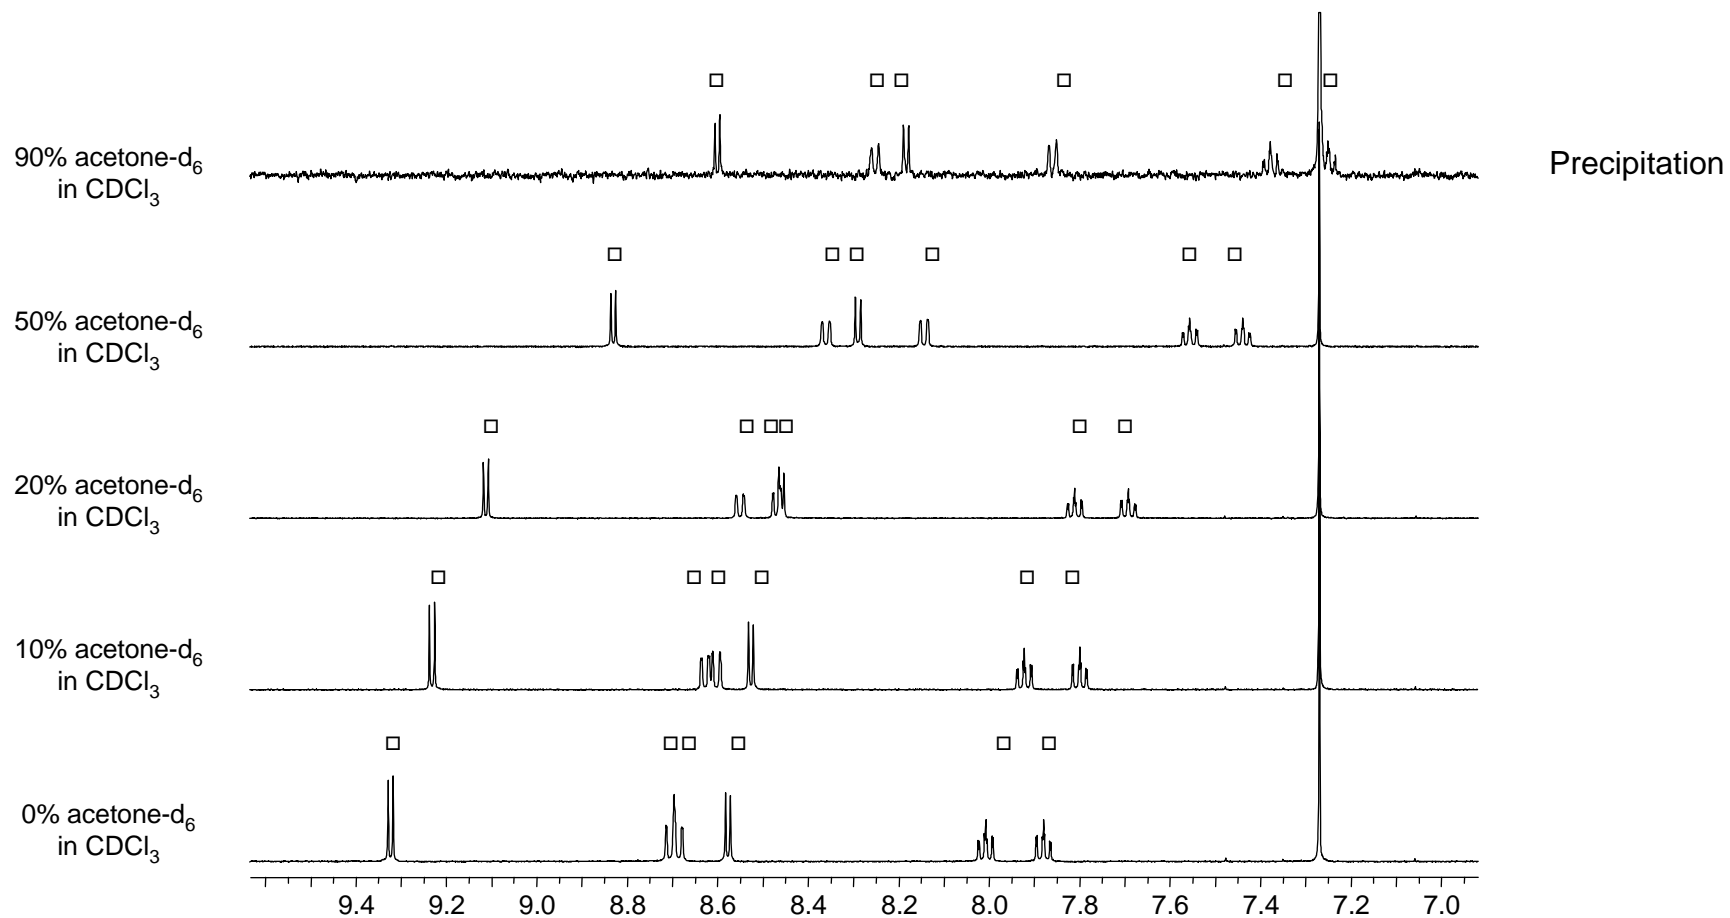

$^1\text{H}$  NMR (500 MHz)

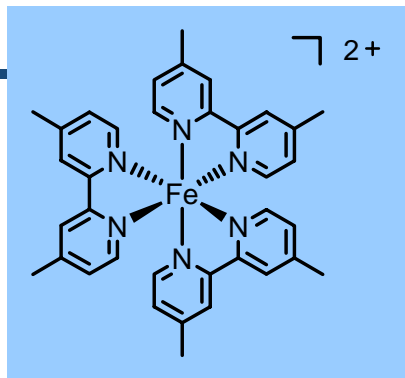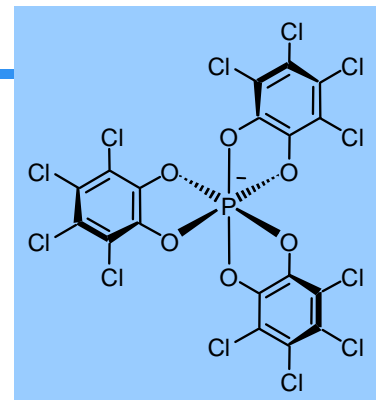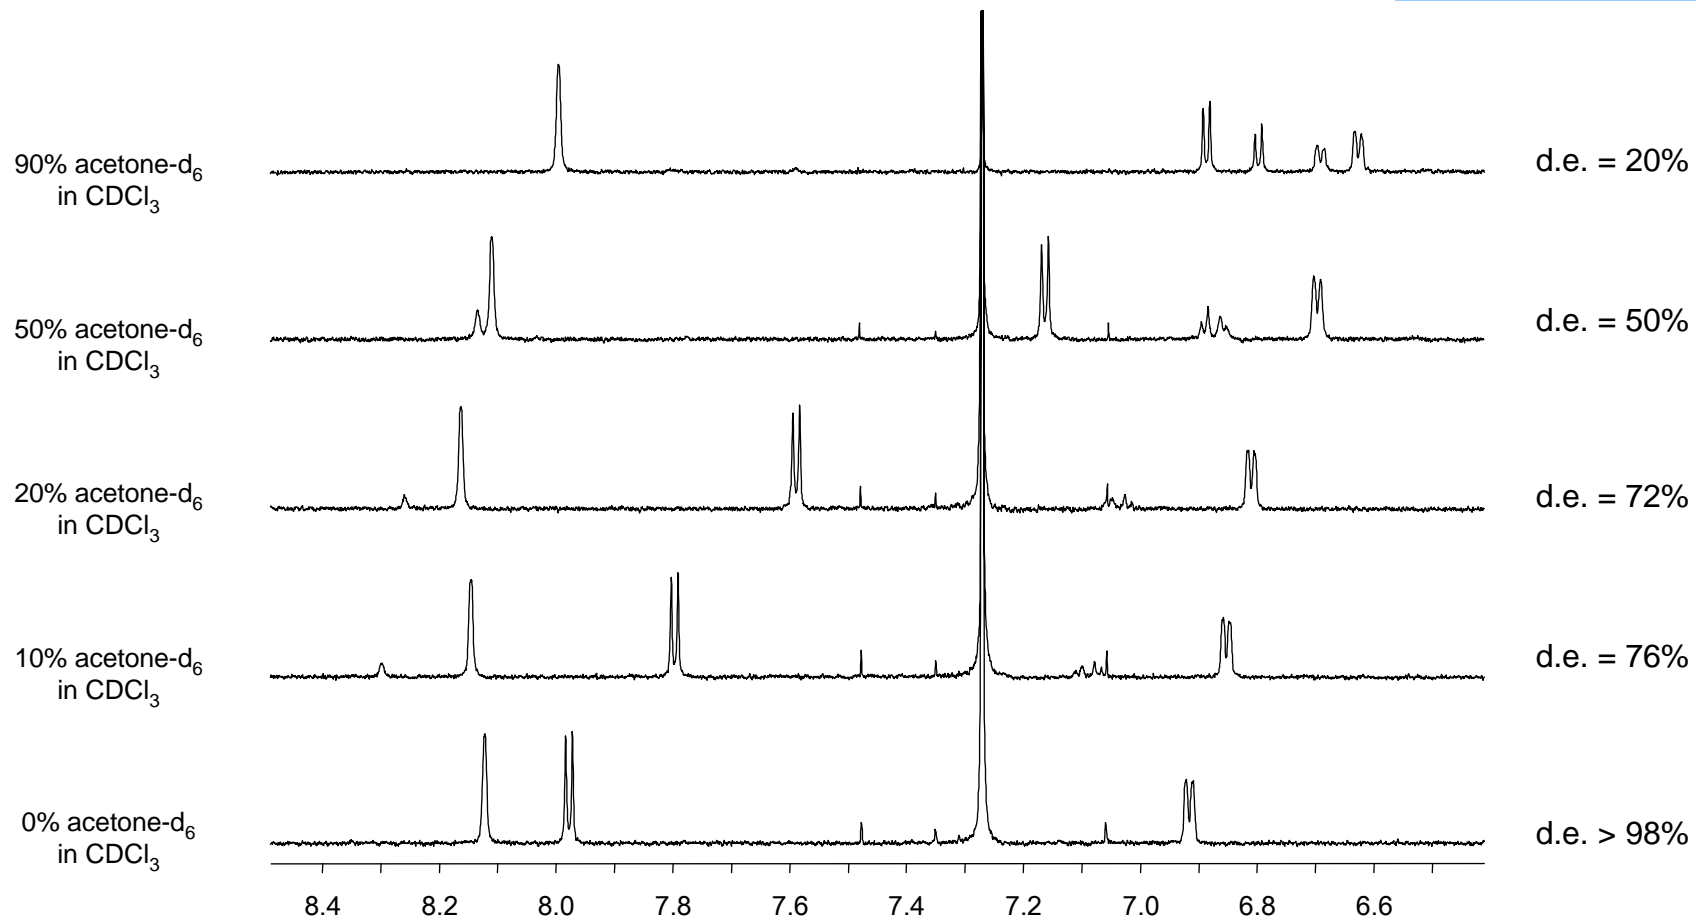

# Experimental and Calculated CD Spectra of $[\text{Fe}(\text{LL})_3][\Delta-1]_2$

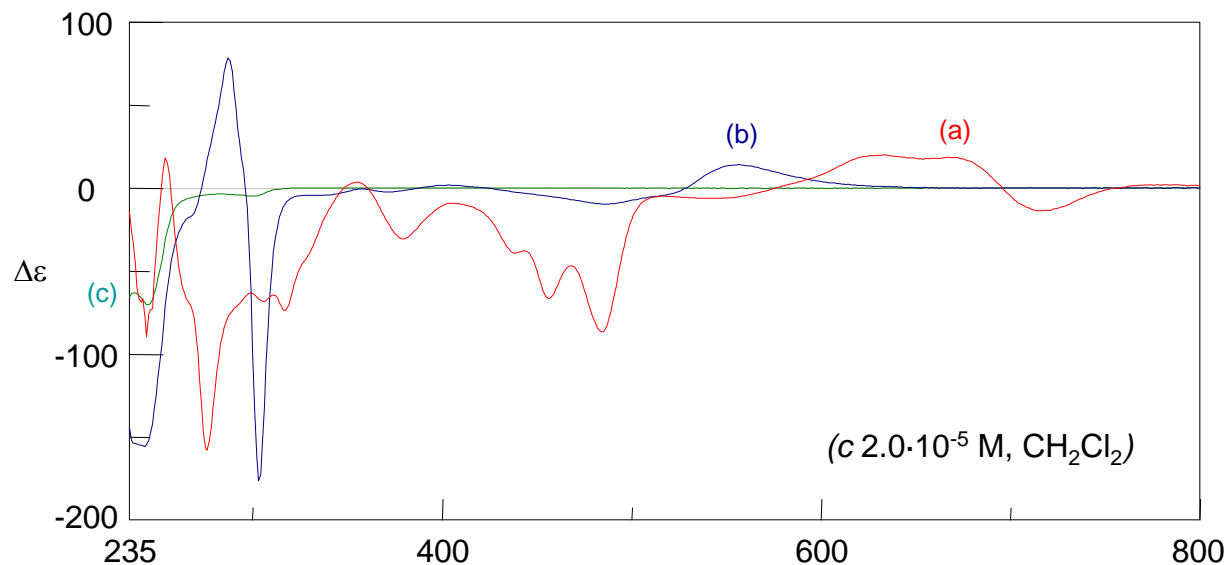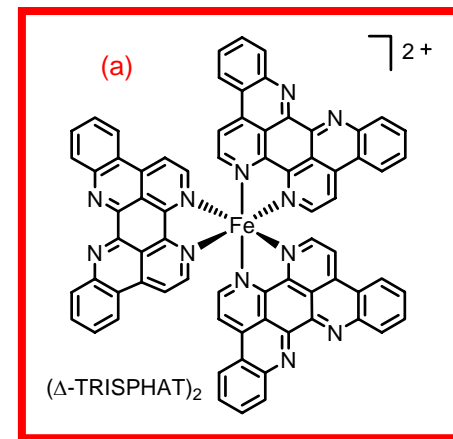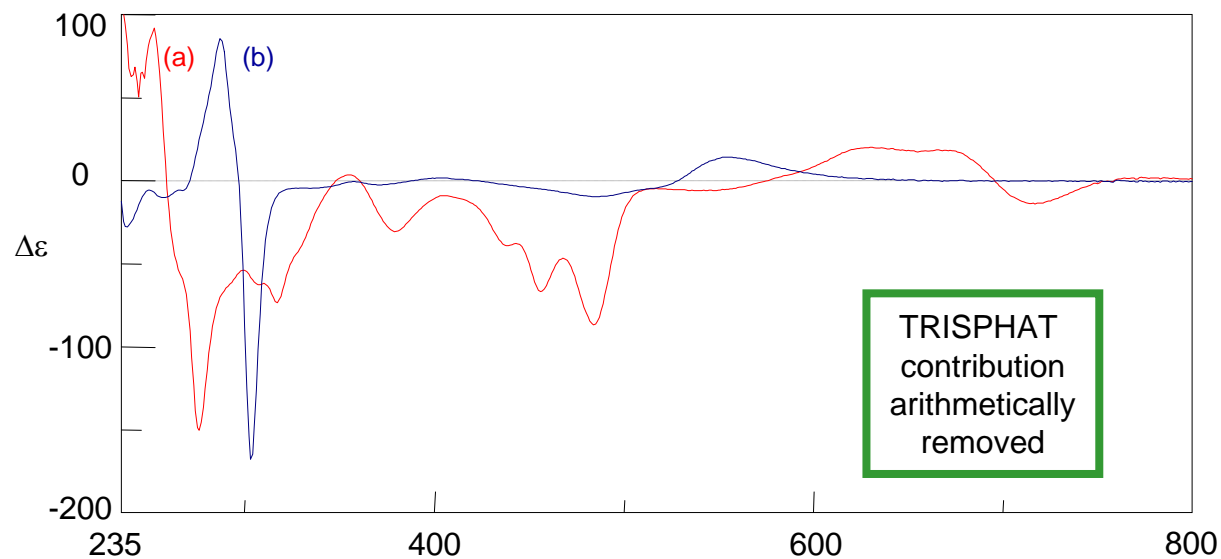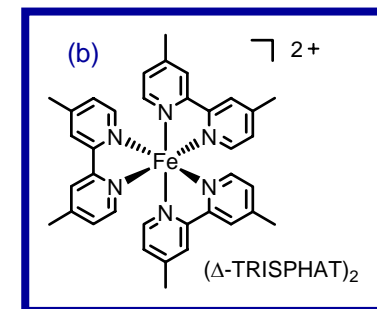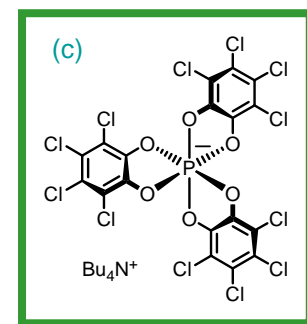

# Diastereoselectivity – CD

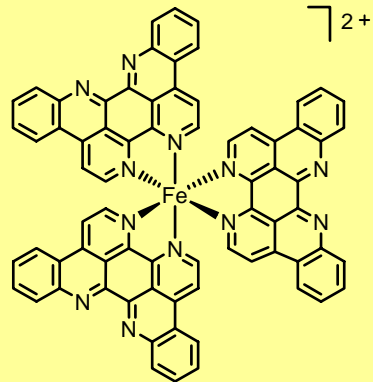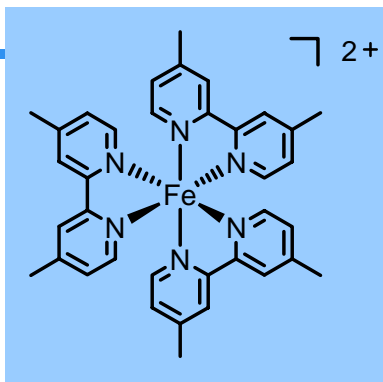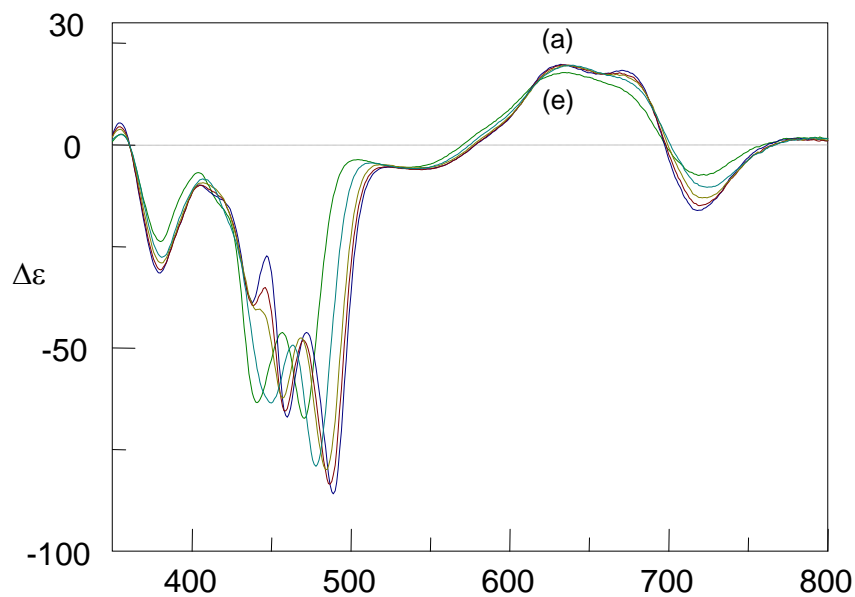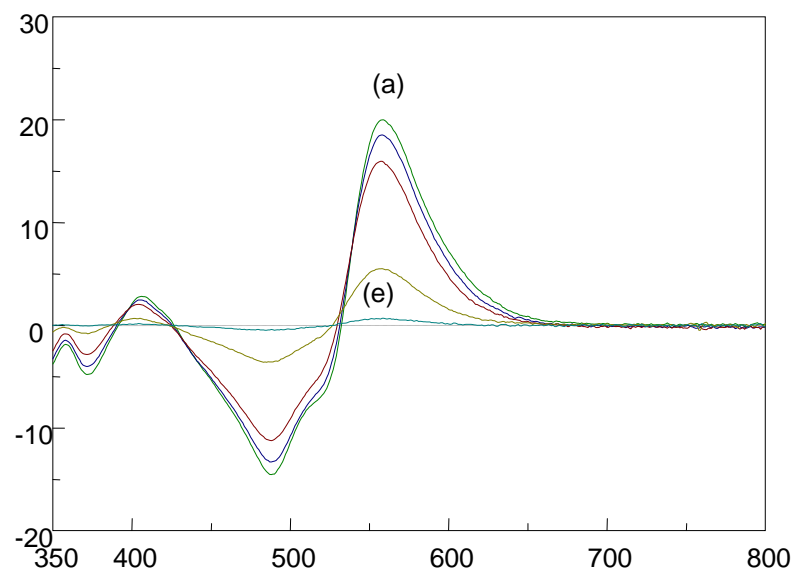

(a) 0% acetone-d<sub>6</sub>  
in CDCl<sub>3</sub>

(b) 10% acetone-d<sub>6</sub>  
in CDCl<sub>3</sub>

(c) 20% acetone-d<sub>6</sub>  
in CDCl<sub>3</sub>

(d) 50% acetone-d<sub>6</sub>  
in CDCl<sub>3</sub>

(e) 90% acetone-d<sub>6</sub>  
in CDCl<sub>3</sub>
